# Supplementary material
Source: PubMed Central journal article supplement (PMC6988400)
Supplement: baADV2019000979-suppl1.pdf [file baADV2019000979-suppl1.pdf]

## Supplementary information

**Table I: Demographics: presentation TOAST classification**

| <b>TOAST classification</b>  | <b>Ischaemic stroke</b> | <b>TIA</b> | <b>Total number of patients</b> |
|------------------------------|-------------------------|------------|---------------------------------|
| Large artery                 | 19                      | 11         | 30 (16.4%)                      |
| Embolism of cardiac origin   | 29                      | 12         | 41 (22.4%)                      |
| Small blood vessel occlusion | 5                       | 4          | 9 (4.9%)                        |
| Other cause                  | 3                       | 1          | 4 (2.2%)                        |
| Undermined aetiology         | 47                      | 52         | 99 (54.1%)                      |
| Total                        | 103                     | 80         | 183 (100%)                      |

**Table II: Modified Rankin score**

| <b>Score</b> | <b>Characteristics</b>                                                                                                      |
|--------------|-----------------------------------------------------------------------------------------------------------------------------|
| 0            | No symptoms at all                                                                                                          |
| 1            | No significant disability despite symptoms, able to carry out all usual duties and activities;                              |
| 2            | Slight disability, unable to carry out all previous activities but able to look after own affairs without assistance        |
| 3            | Moderate disability, requiring some help abut able to walk without assistance                                               |
| 4            | Moderately severe disability, unable to walk without assistance and unable to attend to own bodily needs without assistance |
| 5            | Severe disability, bedridden, incontinent and requiring constant nursing care and attention                                 |
| 6            | Dead                                                                                                                        |

**Table III: NIHSS score (National Institutes of Health Stroke Scale) 0-42**

|       |                                                                           |                           |
|-------|---------------------------------------------------------------------------|---------------------------|
| i)    | Level of consciousness                                                    | 0-3                       |
|       | Ability to answer questions                                               | 0-3                       |
|       | Ability to follow commands,                                               | 0-3                       |
| ii)   | Gaze                                                                      | 0-2                       |
| iii)  | Visual                                                                    | 0-3 (based on hemianopia) |
| iii)  | Facial palsy                                                              | 0-3                       |
| iv)   | Motor function: arm, leg (drift, timing of drift, effort against gravity) | 0-4 for each limb         |
| v)    | Limb ataxia                                                               | 0-2                       |
| vi)   | Sensory                                                                   | 0-2                       |
| vii)  | Language (degree of aphasia)                                              | 0-3                       |
| viii) | Articulation (degree of dysarthria)                                       | 0-2                       |
| ix)   | Extinction and inattention                                                | 0-2                       |

**Table IV: Demographics: comorbidities (total = 292 patients)**

|                                                              | <b>Ischaemic stroke<br/>(n=103)</b> | <b>TIA<br/>(n =80)</b> | <b>Controls (n=109)</b> |
|--------------------------------------------------------------|-------------------------------------|------------------------|-------------------------|
| <i>Hypertension<br/>(prevalence of risk factor in group)</i> | 71 (68.9%)                          | 47 (58.8%)             | 41 (38%)                |
| <i>Hypercholesterolaemia</i>                                 | 41 (39.8%)                          | 37 (46.3%)             | 38 (35.2%)              |
| <i>Previous ischaemic stroke</i>                             | 15 (14.6%)                          | 12 (15%)               | 14 (13.6%)              |
| <i>Previous haemorrhagic stroke</i>                          | 2 (1.9%)                            | 1 (1.3%)               | 1 (0.9%)                |
| <i>Previous TIA</i>                                          | 13 (12.6%)                          | 17 (21.3%)             | 9 (8.4%)                |
| <i>Diabetes type 1</i>                                       | 0                                   | 2 (2.5%)               | 3 (2.9%)                |
| <i>Diabetes type 2</i>                                       | 24 (23.3%)                          | 13 (16.3%)             | 11 (10.7%)              |
| <i>Previous venous thromboembolism</i>                       | 4 (3.8%)                            | 0                      | 1 (0.9%)                |
| <i>Atrial fibrillation</i>                                   | 25 (24.3%)                          | 12 (15%)               | 10 (9.7%)               |
| <i>Cardiac failure</i>                                       | 6 (5.8%)                            | 1 (1.3%)               | 4 (3.9%)                |
| <i>Previous myocardial infarction</i>                        | 7 (6.8%)                            | 3 (3.8%)               | 2 (1.9%)                |
| <i>Peripheral arterial disease</i>                           | 3 (2.9%)                            | 0                      | 0                       |
| <i>Previous PCI or CABG</i>                                  | 5 (4.9%)                            | 5 (6.3%)               | 4 (3.9%)                |
| <i>Smoker</i>                                                | 27 (26.2%)                          | 22 (27.5%)             | 39 (37.9%)              |

The most frequently occurring cardiovascular risk factor in the entire cohort was hypertension (n=166, 56.8%), followed by hypercholesterolaemia (n= 122, 41.7%), smoking (n=88, 30.1%), type 2 diabetes (n=49, 16.8%) and atrial fibrillation (n= 50, 17.1%; supplementary material table I). Baseline medications of the entire cohort included aspirin (15.8%), clopidogrel (10.3%), warfarin (6.8%) and a direct oral anticoagulant (1%). Baseline medications included aspirin (15.8%), clopidogrel (10.3%), warfarin (6.8%) and a direct oral anticoagulant (1%).

**Table V: Demographics: presentation blood group**

|                                                                 | <b>Ischaemic stroke<br/>(n=103)</b> | <b>TIA<br/>(n =80)</b> | <b>Controls<br/>(n=109)</b> | <b>TOTAL<br/>292</b>                 |
|-----------------------------------------------------------------|-------------------------------------|------------------------|-----------------------------|--------------------------------------|
| Blood group: O<br>(total 149: 48% of total cohort)              | 52 (50%)                            | 42 (53%)               | 45 (42%)                    | Chi squared<br>=3.292<br>(p= 0.1928) |
| Blood group A/ B / AB<br>(total 151: total 52% of total cohort) | 51 (50%)                            | 36 (45%)               | 64 (48%)                    |                                      |
| Unknown (n=2)                                                   | 0                                   | 2 (3%)                 | 0                           |                                      |

### **ABO blood group effect**

Comparing blood group O versus non-O showed significant differences in VWF<sub>Ag</sub>, Ac and FVIII in the overall cohort: median values in blood group O vs blood group A/B/AB (IU/dL); VWF<sub>Ag</sub> 161.4 vs 193.6, p=0.0061, VWF<sub>Ac</sub> 148.3 vs 170.6, p=0.0081 and FVIII 140 vs 164.5, p=0.0008.

ADAMTS13<sub>Ac</sub> levels showed no differences according to blood group in the overall cohort:

ADAMTS13<sub>Ac</sub> 90.7 vs 92.0IU/dL, p=0.545. The same pattern was seen in the control group.

There was, however, no difference in VWF levels according to blood group in ischaemic stroke and TIA. Adjusting for blood group in comparison of ischaemic stroke vs control patients maintained the same differences in VWF<sub>Ag</sub>, VWF<sub>Ac</sub>, FVIII and ADAMTS13<sub>Ac</sub>.

For the VWF<sub>Ag</sub>- ADAMTS13<sub>Ac</sub> ratio, there was no difference in the ischaemic stroke group according to whether blood group O versus A/B/AB (2.25 vs 2.64, p=0.319). Adjustment for blood group did show a higher VWF<sub>Ag</sub>-ADAMTS13<sub>Ac</sub> in patients of blood group A/B/AB versus O in TIA and control groups (TIA blood groups A/B/AB 2.01 vs O 1.59, p=0.044; control blood groups A/B/AB 1.821 vs O 1.463, p=0.0086).

## Anticoagulation

In the ischaemic stroke group, warfarin therapy did not influence presentation VWFAg: warfarinised (n=8) vs not (n=94); 238.8 vs 194.3IU/dL, p= 0.0677, ADAMTS13 (warfarinised vs not, 82.5 vs 86IU/dL, p=0.8144) or the overall VWFAg/ADAMTS13Ac ratio (warfarinised vs not, 3.351 vs 2.308, p=0.0576). Expected reduction in thrombin generation with anticoagulation was apparent: warfarinised vs not, ETP 790 vs 1730NM/min, p<0.0001; peak thrombin 85.06 vs 271.6nM, p<0.0001).

Anticoagulation with warfarin or full dose dalteparin did not influence follow up VWFAg or ADAMTS13Ac: anticoagulated (n=9) vs not (n=30): VWFAg 141 vs 140.8IU/dL, p=0.7996; ADAMTS13Ac 90.9 vs 96.95IU/dL, p=0.465).

**Table VI: Multiple linear regression: CRP at presentation**

|                         |             |           |        |       |                         |          |
|-------------------------|-------------|-----------|--------|-------|-------------------------|----------|
| Source                  | SS          | df        | MS     |       | Number of obs           | 140      |
| Model                   | 4849.401    | 2         | 2424.7 |       | F (2,137)               | 9.23     |
| Residual                | 35999.975   | 137       | 262.77 |       | Prob> F                 | 0.0002   |
| Total                   | 40849.37    | 139       | 293.88 |       | R-squared               | 0.1187   |
|                         |             |           |        |       | Adj R-squared           | 0.1058   |
|                         |             |           |        |       | Root MSE                | 16.21    |
| ADAMTS13Ac presentation | Coefficient | Std error | t      | P>t   | 95% confidence interval |          |
| Bilirubin               | -0.7345     | 0.2016    | -3.64  | 0.000 | -1.133197               | -0.3358  |
| CRP                     | -0.1767     | 0.0851    | -2.07  | 0.040 | -034514                 | -0.00830 |
| _cons                   | 96.31       | 2.3919    | 40.27  | 0.000 | 91.58229                | 101.0419 |

### CRP and VWFAg- ADAMTS13Ac

There was a significant difference in CRP between groups at presentation (median, range): ischaemic stroke 2.7 (0.6-105), TIA 1.8 (0-74.1) and control 1.5 (0.6-120.9); KW 11.34, p=0.0035. There was correlation between the control group CRP and VWFAg: ADAMTS13Ac (r=0.324, p=0.0013), but not seen in ischaemic stroke (r= 0.175, p=0.107) or TIA (r= 0.175, p=0.136). Multivariate regression analysis identified CRP and bilirubin to be independent predictors of ADAMTS13 at presentation of ischaemic stroke and TIA, demonstrating a negative association (Table VI) not seen with VWFAg or VWFAg- ADAMTS13Ac. There was no correlation with presentation CRP and final follow-up VWFAg-ADAMTS13Ac.

**Figure 1: ROC curve analysis: VWFAg-ADAMTS13Ac ratio as predictive for mortality**

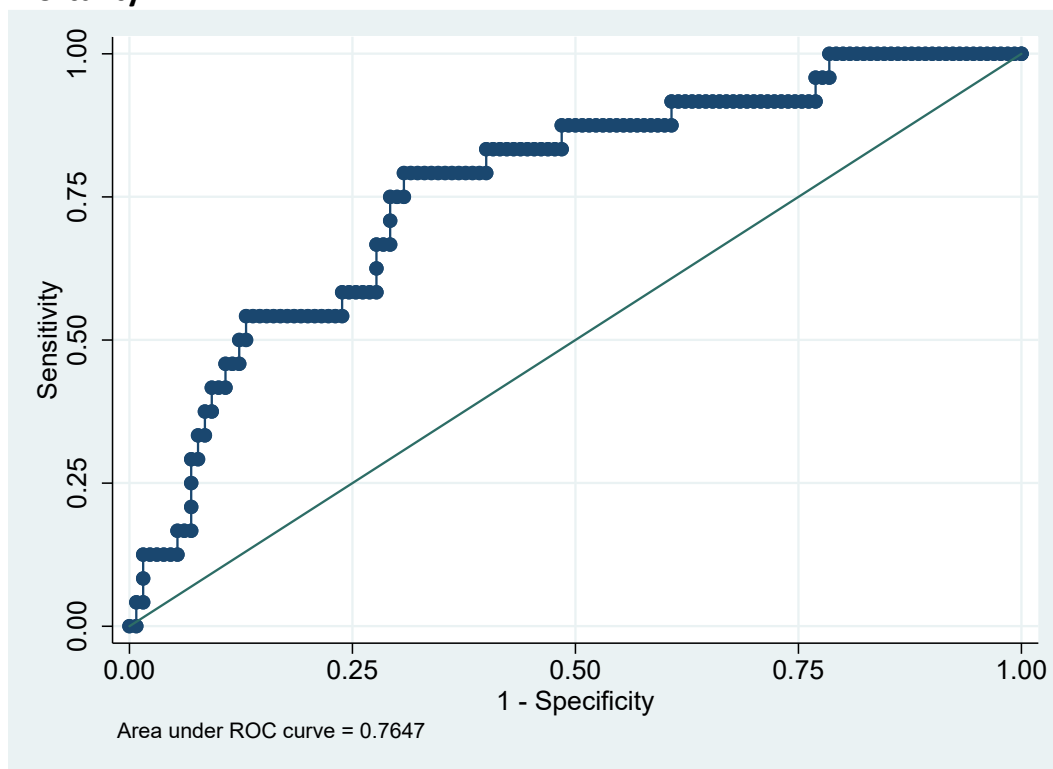

Figure 1 is a graphical representation of the receiver operator characteristic (ROC) curve analysis demonstrating sensitivity and specificity of the presenting VWFAg-ADAMTS13Ac ratio for mortality. The area under the curve (AUC) measures how well the presenting VWFAg-ADAMTS13Ac ratio can distinguish those patients who died and those who survived at follow up. The AUC of 0.765 (a perfect test being 1, a worthless test being 0.5) demonstrates predictive value of the ratio (95% confidence interval 0.664- 0.866).

**Table VII: Survival in ischaemic stroke and TIA according to presentation  
VWFag: ADAMTS13Ac: chi squared testing**

Progressive increases in the baseline VWF-ADAMTS13 ratio, correlates significantly (by chi squared testing) with survival. Incremental ratios of VWFag/ ADAMTS13Ac are shown, and with progressive ratio increase the significant correlation to mortality increases. Analysis at above and below a ratio of 2.6 is specifically added following the ROC curve analysis above highlighting this as an appropriate cut-off for sensitivity and specificity.

| <b>Baseline VWF-ADAMTS13 ratio</b> | <b>Alive</b> | <b>Deceased</b> | <b>Total</b> | <b>Chi squared</b>                         |
|------------------------------------|--------------|-----------------|--------------|--------------------------------------------|
| ≤1                                 | 15           | 0               | 15           | 2.535 (p=0.1113, NS)                       |
| >1                                 | 140          | 24              | 164          |                                            |
| ≤1.1                               | 18           | 0               | 18           | 3.099 (P=0.0784, NS)                       |
| >1.1                               | 137          | 24              | 161          |                                            |
| ≤1.2                               | 27           | 0               | 27           | 4.923 (p=0.0265)<br>OR 10.5 (0.62-177.4)   |
| >1.2                               | 128          | 24              | 152          |                                            |
| ≤1.3                               | 36           | 0               | 36           | 6.977 (p=0.0083)<br>OR 14.97 (0.89- 252.4) |
| >1.3                               | 119          | 24              | 143          |                                            |
| ≤1.4                               | 38           | 0               | 38           | 7.47 (p=0.0063)<br>OR 16.06 (0.953-270.5)  |
| >1.4                               | 117          | 24              | 141          |                                            |
| ≤ 1.5                              | 43           | 0               | 43           | 8.763 (p=0.0031)<br>OR 18.95 (1.127-318.6) |
| > 1.5                              | 112          | 24              | 136          |                                            |
| ≤ 1.6                              | 47           | 0               | 47           | 9.87 (p=0.0017)<br>OR 21.45 (1.28 -360.4)  |
| > 1.6                              | 108          | 24              | 132          |                                            |
| ≤ 1.7                              | 54           | 1               | 55           | 9.19 (p=0.0024)<br>OR 12.3 (1.62-93.6)     |
| > 1.7                              | 101          | 23              | 124          |                                            |
| ≤ 1.8                              | 61           | 2               | 63           | 8.77 (p=0.0031)<br>OR 7.14 (1.62- 31.2)    |
| > 1.8                              | 94           | 22              | 116          |                                            |
| ≤ 1.9                              | 70           | 2               | 72           | 11.72 (p=0.0006)<br>OR 9.059 (2.06- 39.9)  |
| > 1.9                              | 85           | 22              | 107          |                                            |
| ≤ 2                                | 77           | 3               | 80           | 11.62 (p=0.0007);<br>OR 6.9 (1.98 - 24.1)  |
| > 2                                | 78           | 21              | 99           |                                            |
| ≤ 2.6                              | 80           | 5               | 85           | 14.23 (p=0.0002)<br>OR 6.33 (2.22-18.1)    |
| > 2.6                              | 48           | 19              | 67           |                                            |
| ≤ 3                                | 10           | 121             | 131          | 14.03 (p=0.0002);<br>OR 4.98 (2.033-12.2)  |
| > 3                                | 34           | 14              | 48           |                                            |
| ≤ 4                                | 143          | 15              | 158          | 17.7 (p< 0.0001)<br>OR 7.15 (2.59- 19.7)   |
| > 4                                | 12           | 9               | 21           |                                            |

**Table VIII: Presentation VWFAg: ADAMTS13Ac correlation with stroke functional scores (Spearman rank non-parametric)**

| IU/dL,<br>95% C.I.         | Age                                           | mRS (Rankin)                                  | NIHSS                                         | GCS                                           |
|----------------------------|-----------------------------------------------|-----------------------------------------------|-----------------------------------------------|-----------------------------------------------|
| <b>VWFAg</b>               | <b>0.531</b><br>(0.439- 0.611)<br>p<0.0001    | <b>0.396</b><br>(0.289-0.493)<br>p<0.0001     | <b>0.267</b><br>(0.152- 0.375)<br>p<0.0001    | <b>-0.222</b><br>(-0.332- -0.105)<br>p=0.0002 |
| <b>ADAMTS13</b>            | <b>-0.328</b><br>(-0.430- -0.218)<br>p<0.0001 | <b>-0.298</b><br>(-0.404- -0.185)<br>p<0.0001 | <b>-0.283</b><br>(-0.389- -0.169)<br>p<0.0001 | <b>0.194</b><br>(0.0769- 0.306)<br>p=0.0009   |
| <b>VWFAg/<br/>ADAMTS13</b> | <b>0.577</b><br>(0.491-0.651)<br>p<0.0001     | <b>0.447</b><br>(0.345- 0.538)<br>p<0.0001    | <b>0.337</b><br>(0.227- 0.439)<br>p<0.0001    | <b>-0.255</b><br>(-0.363- -0.140)<br>p<0.0001 |

Table VIII: There is a positive correlation (Spearman rank) between VWFAg with age, mRS and NIHSS and negative correlation with GCS. An inverse correlation was seen with ADAMTS13 and mRS, NIHSS and age; and a positive correlation with GCS. The VWFAg-ADAMTS13Ac ratio was positively correlated with age, mRS and NIHSS and negatively correlated with GCS: reflective of correlation with disability.



## Thrombolysis and VWFag-ADAMTS13Ac

Figure II below illustrates the resolution of ADAMTS13Ac over time in the thrombolysed IS cohort, not evident in the non-thrombolysed IS cohort.

**Figure II: ADAMTS13Ac in thrombolysed IS**

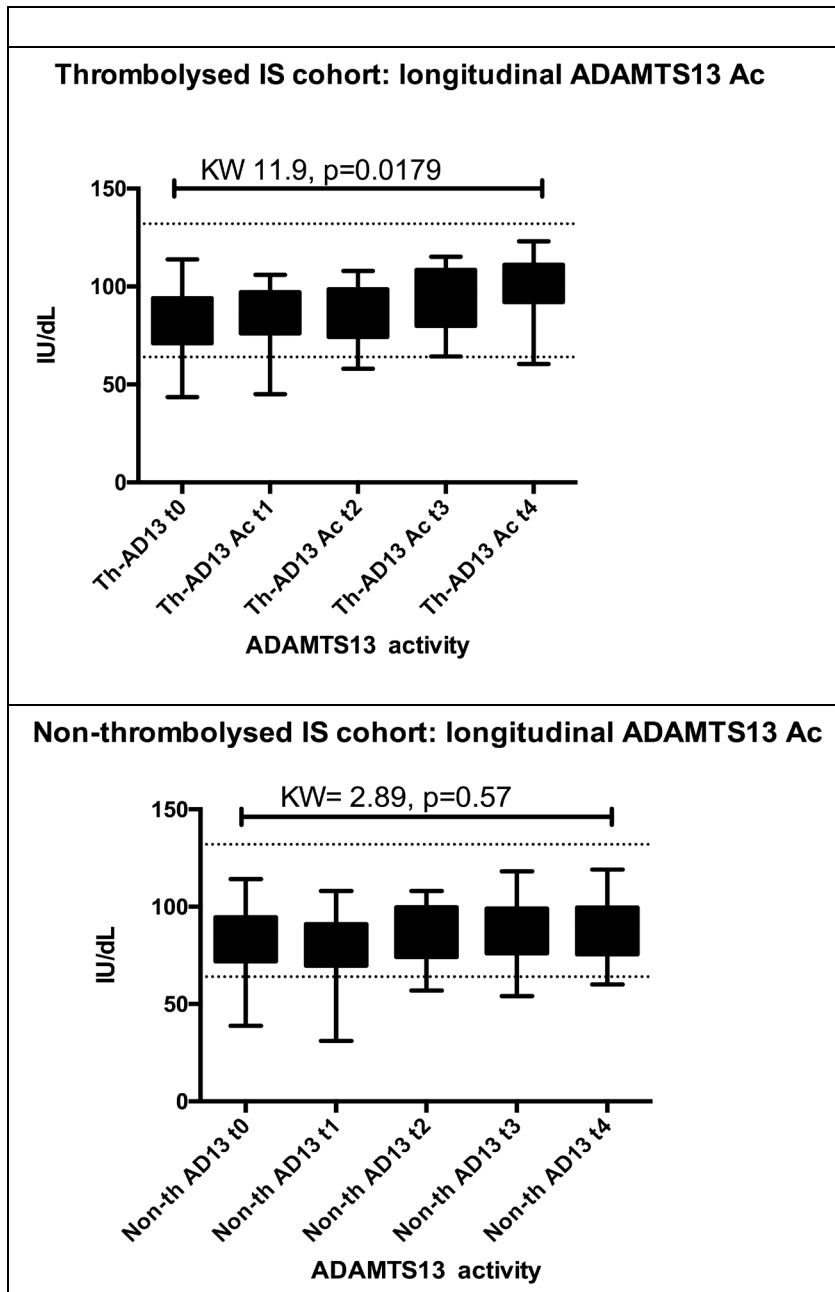

Longitudinal analysis shows increasing ADAMTS13Ac and decreasing vWFag in the thrombolysed group but absent in the non- thrombolysed group.

## Tables IX- XII: multiple linear regression in IS and TIA combined

Multiple linear regression was performed using Stata to more closely examine the potential relationships of clinical stroke scores with the VWFag-ADAMTS13Ac axis in the ischaemic stroke/TIA cohort. All the measured laboratory haemostatic markers (VWFag, VWFac, ADAMTS13, FVIII, peak thrombin, ETP) were entered into a multiple linear regression model to investigate impact on functional scores. Each variable was subtracted until significance. Presentation VWFag and ADAMTS13Ac were included as independent variables in the model and reached significance for both presentation mRS (Table IX), and for presentation NIHSS score (Table X). Further longitudinal analysis showed significance of the presentation VWFag-ADAMTS13Ac analysis for mRS at timepoint 2 (48 hours post presentation, Table XI) and final follow up (>6 weeks post presentation, Table XII).

Table IX: Multiple linear regression of VWFag and ADAMTS13Ac combined as independent variables, with presentation mRS as dependent (outcome) variable. The model explains 15% of variability in presentation mRS score (R-squared= 15%). The coefficients show that VWFag has a positive association with the model (VWFag increases along with the presentation mRS), while ADAMTS13Ac is negatively associated (ADAMTS13Ac decreases, as the presentation mRS increases).

**Table IX: Regression of presentation mRS with presentation VWFag and ADAMTS13Ac**

|                  |             |           |            |       |                         |            |
|------------------|-------------|-----------|------------|-------|-------------------------|------------|
| Source           | SS          | df        | MS         |       | Number of obs           | 174        |
| Model            | 84.1246689  | 2         | 42.0623344 |       | F (2,171)               | 15.2       |
| Residual         | 473.214412  | 171       | 2.76733574 |       | Prob> F                 | 0.0000     |
| Total            | 557.33908   | 173       | 3.22161318 |       | R-squared               | 0.1509     |
|                  |             |           |            |       | Adj R-squared           | 0.1410     |
|                  |             |           |            |       | Root MSE                | 1.6635     |
| mRS presentation | Coefficient | Std error | t          | P>t   | 95% confidence interval |            |
| VWFag            | 0.0063287   | 0.0014144 | 4.47       | 0.000 | 0.0035368               | 0.0091205  |
| ADAMTS13Ac       | -0.0169759  | 0.0073922 | -2.30      | 0.023 | -0.315677               | -0.0023841 |
| _cons            | 2.293619    | 0.7661597 | 2.99       | 0.003 | 0.7812698               | 3.805967   |

Table X: Multiple linear regression of VWFag and ADAMTS13 combined as independent variables, with presentation NIHSS as dependent (outcome) variable. The model explains 6.7% of variability in presentation NIHSS score (R-squared=0.67). Coefficients indicate that VWFag has a positive

association with the model (as VWFAg increases, so does the presentation mRS), while ADAMTS13 is negatively associated (as ADAMTS13 decreases, the presentation mRS increases).

**Table X: Regression of presentation NIHSS with presentation VWFAg and ADAMTS13Ac**

| Source             | SS          | df        | MS         |       | Number of obs           | 177        |
|--------------------|-------------|-----------|------------|-------|-------------------------|------------|
| Model              | 406.169536  | 2         | 203.084768 |       | F (2,174)               | 6.29       |
| Residual           | 5618.67792  | 174       | 32.2912524 |       | Prob> F                 | 0.0023     |
| Total              | 6024.84746  | 176       | 34.2320878 |       | R-squared               | 0.0674     |
|                    |             |           |            |       | Adj R-squared           | 0.0567     |
|                    |             |           |            |       | Root MSE                | 5.6825     |
| NIHSS presentation | Coefficient | Std error | t          | P>t   | 95% confidence interval |            |
| VWFAg              | 0.0095569   | 0.0048361 | 1.98       | 0.050 | 0.0000119               | 0.0191019  |
| ADAMTS13Ac         | -0.0615642  | 0.0248529 | -2.48      | 0.014 | -0.1106161              | -0.0125123 |
| _cons              | 7.635633    | 2.586321  | 2.95       | 0.004 | 2.531033                | 12.74023   |

Table XI: Univariate linear regression of VWFAg as an independent variable, with mRS at 48 hours post presentation as dependent (outcome) variable. The model explains 6% of variability in MRS score (R-squared= 0.596). The coefficient demonstrates that VWFAg has a positive association with the model (as VWFAg increases, so does mRS at 48 hours post presentation).

**Table XI: Regression of mRS at 48 hours post presentation with presentation VWFAg**

| Source   | SS          | df        | MS         |       | Number of obs           | 67        |
|----------|-------------|-----------|------------|-------|-------------------------|-----------|
| Model    | 7.11846611  | 1         | 7.11846611 |       | F (1, 65)               | 4.12      |
| Residual | 112.284519  | 65        | 1.72745414 |       | Prob> F                 | 0.0465    |
| Total    | 119.402985  | 66        | 1.80913614 |       | R-squared               | 0.0596    |
|          |             |           |            |       | Adj R-squared           | 0.0451    |
|          |             |           |            |       | Root MSE                | 1.3143    |
| mRS t2   | Coefficient | Std error | t          | P>t   | 95% confidence interval |           |
| VWFAg t0 | 0.0035811   | 0.0017641 | 2.03       | 0.046 | 0.0000579               | 0.0071043 |
| _cons    | 2.533564    | 0.4368177 | 5.80       | 0.000 | 1.661179                | 3.405949  |

Table XII: Multiple linear regression of the VWFAg/ADAMTS13 ratio as an independent variable, with mRS at final follow-up as dependent (outcome) variable. The model explains almost 10% of the total variation in final mRS (R-squared= 0.0987). The coefficient indicates that the VWFAg-

ADAMTS13Ac ratio at presentation has a positive association with the model (as the ratio increases, so does the final follow up mRS).

**Table XII: Regression of mRS at final follow up with presentation VWFAg-ADAMTS13Ac**

| Source                  | SS          | df        | MS         |       | Number of obs           | 54        |
|-------------------------|-------------|-----------|------------|-------|-------------------------|-----------|
| Model                   | 14.208221   | 1         | 14.208221  |       | F (1, 52)               | 5.69      |
| Residual                | 129.791779  | 52        | 2.49599575 |       | Prob> F                 | 0.0207    |
| Total                   | 144         | 53        | 2.71698113 |       | R-squared               | 0.0987    |
|                         |             |           |            |       | Adj R-squared           | 0.0813    |
|                         |             |           |            |       | Root MSE                | 1.5799    |
| mRS t4                  | Coefficient | Std error | t          | P>t   | 95% confidence interval |           |
| VWFAg-ADAMTS13<br>Ac t0 | 0.4466101   | 0.1871891 | 2.39       | 0.021 | 0.0709876               | 0.8222325 |
| _cons                   | 0.0058267   | 0.468855  | 0.01       | 0.990 | -0.9350609              | 0.9467142 |
